# Supplementary material for: Mechanisms of unconventional CD8 Tc2 lymphocyte induction in allergic contact dermatitis: Role of H3/H4 histamine receptors
Source: PubMed Central journal article supplement (PMC9586454; doi:10.3389/fimmu.2022.999852), 2022-10-07
Supplement: DataSheet_1.pdf [file DataSheet_1.pdf]

| <b>Antibody</b>         | <b>Clone</b> | <b>Reference</b> | <b>Source</b> | <b>Isotype</b>                     |
|-------------------------|--------------|------------------|---------------|------------------------------------|
| Anti-mouse-IA-d         | 39-46-8      | 553548           | BD Pharmingen | Mouse IgG2b, $\kappa$              |
| Anti-mouse-CD11c        | HL3          | 553801           | BD Pharmingen | Armeniam hamster IgG1, $\lambda$ 2 |
| Anti-mouse-CD11b        | M1-70        | 553310           | BD Pharmingen | DA/HA IgG2b, $\kappa$              |
| Anti-mouse-GR1          | RB6-8C5      | 22155244         | Immunotools   | Rat IgG2b                          |
| Anti-mouse-CCR7         | 4B12         | 12-1971-82       | eBiosciences  | Rat IgG2a, $\kappa$                |
| Anti-mouse-CD8          | H35-17.2     | 550798           | BD Pharmingen | Rat IgG2b, $\kappa$                |
| Anti-mouse-CD4          | RM4-5        | 561090           | BD Pharmingen | Rat IgG2a, $\kappa$                |
| Anti-mouse-Foxp3        | FJK-16s      | 11-5773-82       | ebiosciences  | Rat IgG2a, $\kappa$                |
| Anti-mouse-CD25         | 3C7          | 553075           | BD Pharmingen | Lewis IgG2b, $\kappa$              |
| Anti-mouse-CD40         | HM40-3       | 553723           | BD Pharmingen | Rat(Lou)IgG2a, $\kappa$            |
| Anti-mouse-IL-13        | EBio13A      | 12-7133-81       | eBiosciences  | IgG1, $\kappa$                     |
| Anti-mouse-IFN $\gamma$ | XMG1.2       | 11-7311-81       | eBiosciences  | IgG1, $\kappa$                     |

Table S1: Detail of the antibodies used in the experimental procedure

| <b>Name of oligonucleotide</b> | <b>Sequence Fw (5' to 3')</b> | <b>Sequence Rv (5' to 3')</b> | <b>Specificity</b> |
|--------------------------------|-------------------------------|-------------------------------|--------------------|
| IL-10                          | ACCAAAGCCACAAAGCAG            | GCCAGTCAGTAAGAGCAGG           | mouse              |
| IL-17                          | TTTCAGCAAGGAATGTGGA           | AACACGAAGCAGTTTGGG            | mouse              |
| IL-5                           | ATGAAGTGCTGGAGATGGAA          | GCAACGAAGAGGATGAGGG           | mouse              |
| IL-13                          | TCTTGCTTGCCTTGGTGC            | TGGTCTTGTGATGTTGCT            | mouse              |
| CCR7                           | TTAGCAAGCAAGCAAGAGATGA        | CGGTGGAGAGGCAGAAGG            | mouse              |
| CXCR3                          | GTCCTCCTTGATGTTGGGCT          | TGGTGTTGTCCTTGTTGCTG          | mouse              |

Table S2: Oligonucleotide sequences in Real-time PCR
